# Supplementary material for: PVdF-HFP/exfoliated graphene oxide nanosheet hybrid separators for thermally stable Li-ion batteries
Source: Royal Society of Chemistry journal article supplement (doi:10.1039/c6ra15062d), 2016-01-01
Supplement: c6ra15062d1.pdf [file c6ra15062d1.pdf]

[Supporting Information]

# PVdF-HFP/Exfoliated Graphene Oxide Nanosheets Hybrid Separators for Thermally Stable Li-ion Batteries

*Yunah Choi<sup>a</sup>, Kan Zhang<sup>a</sup>, Kyung Yoon Chung<sup>b</sup>, Dong Hwan Wang<sup>c\*</sup>, and Jong Hyeok Park<sup>a\*</sup>*

<sup>a</sup>Department of Chemical and Biomolecular Engineering, Yonsei University, 50 Yonsei-ro,  
Seodaemun-gu, Seoul 120-749, Republic of Korea

**KEYWORDS:** Li-ion battery; separators; graphene oxide; safety; thermal stability

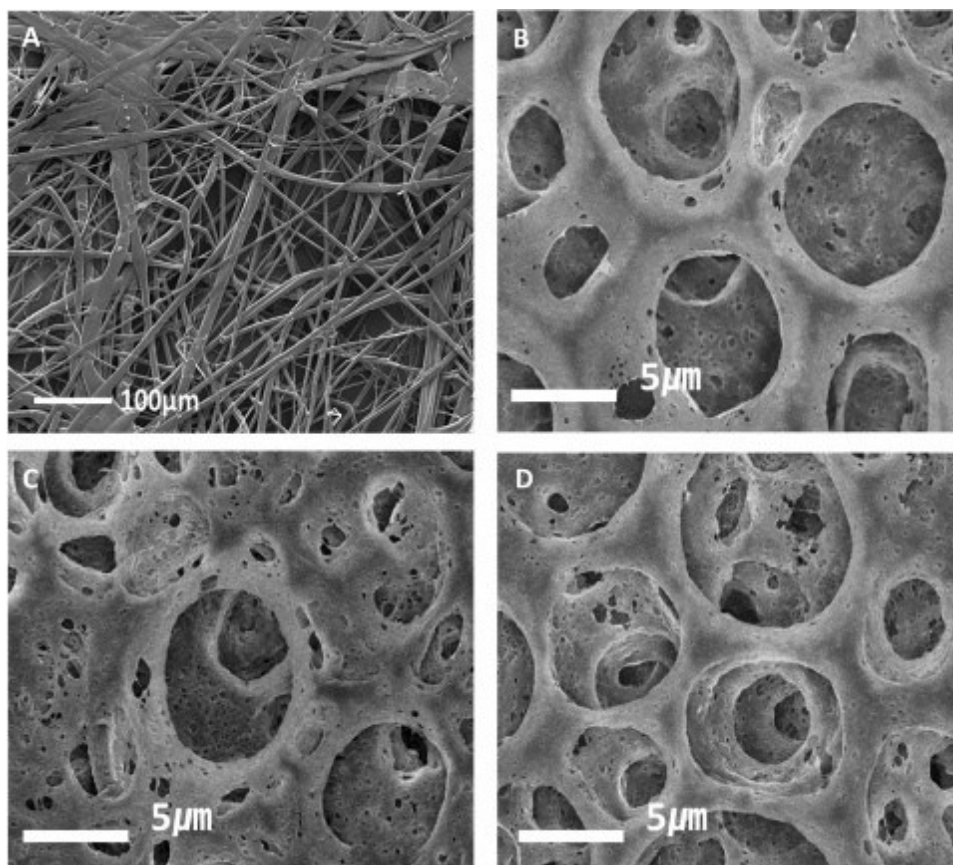

**Figure S1. SEM micrographs of the surfaces of (a) Pure Nonwoven substrate and PVdF-HFP separator prepared using a 7:3 ration of PVdF A to B, by weight, with various GO nanosheets contexts : (b) 0.0033 wt%, (c) 0.0044 wt%, (d) 0.0066 wt%**

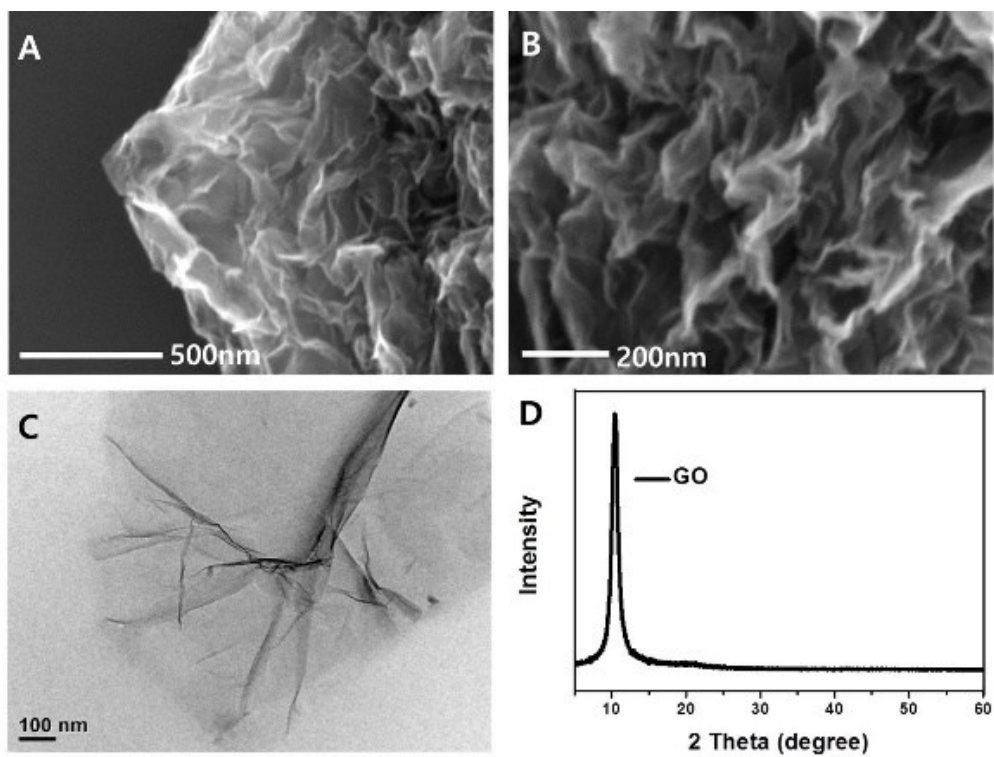

**Figure S2.** (A, B) SEM images of GO nanosheets (C) TEM images of GO and (D) XRD patterns of GO nanosheets.

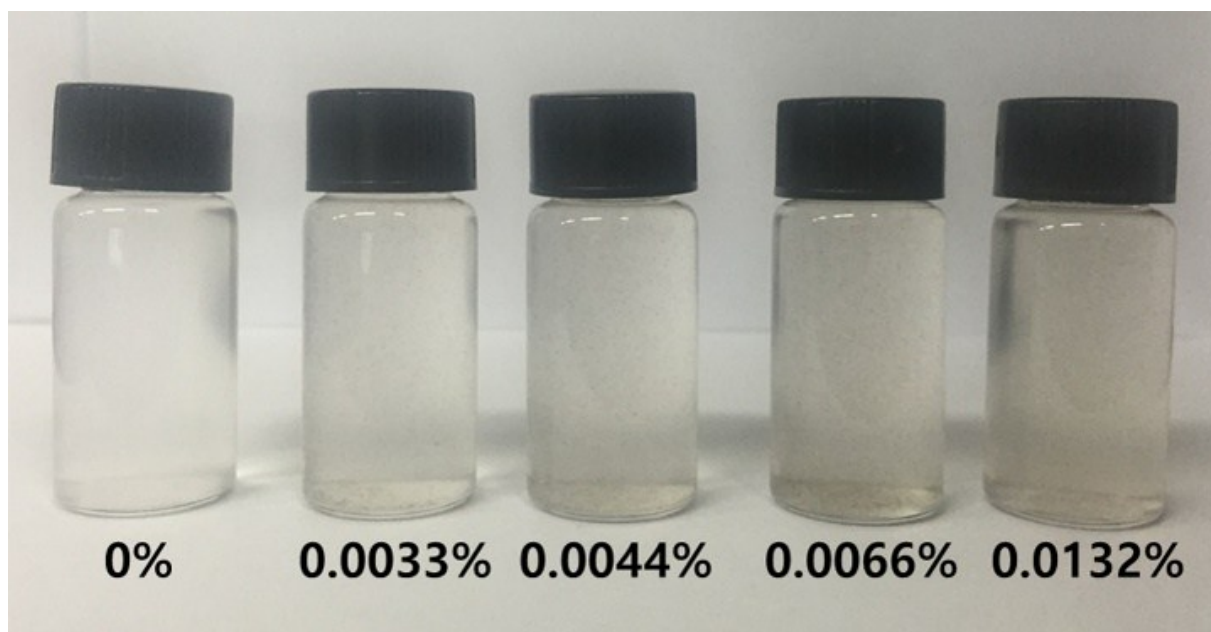

**Figure S3.** Photographs of solutions of dispersed GO nanosheets in DI water.

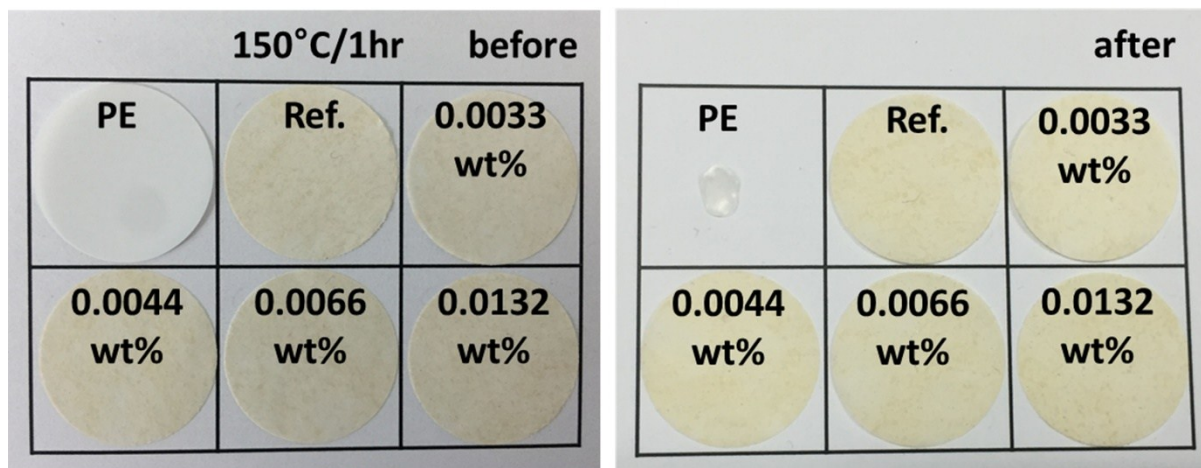

**Figure S4.** Thermal shrinkage photographs of nanocomposite separators with various contents of exfoliated GO: (left) before and (right) after being stored at 150 °C for 1 hour.
